# Supplementary material
Source: PubMed Central journal article supplement (PMC6453546)
Supplement: mmc1.pdf [file mmc1.pdf]

**YMTHE, Volume 27**

**Supplemental Information**

**RNA-Modified T Cells Mediate Effective**

**Delivery of Immunomodulatory**

**Cytokines to Brain Tumors**

**Fernanda Pohl-Guimarães, Changlin Yang, Kyle A. Dyson, Tyler J. Wildes, Jeffrey Drake, Jianping Huang, Catherine Flores, Elias J. Sayour, and Duane A. Mitchell**

# Supplementary figure 1

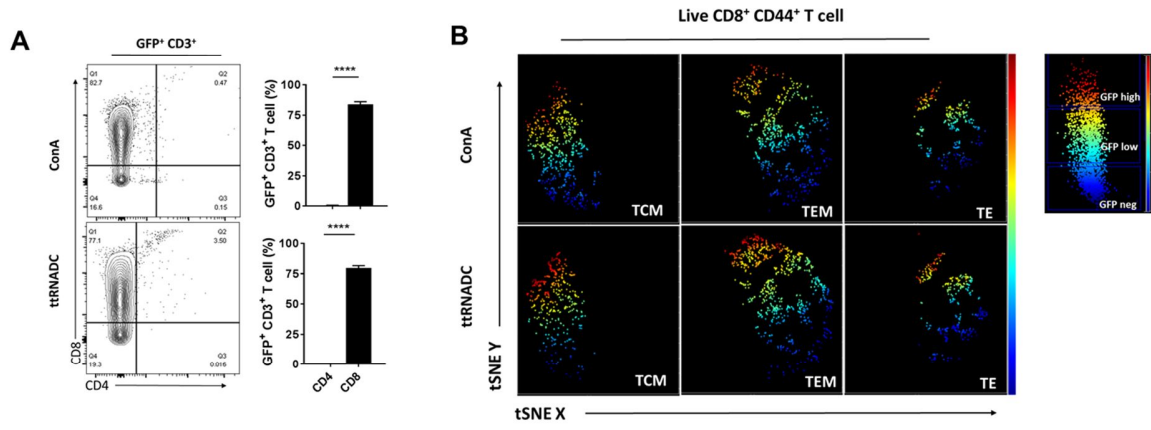

## Supplementary figure 2

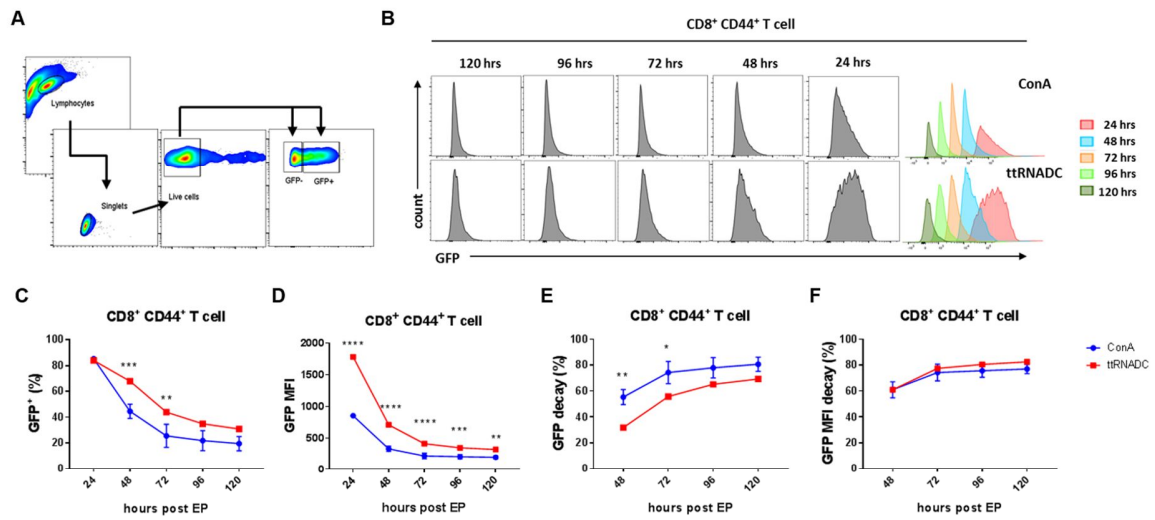

### Supplementary figure 3

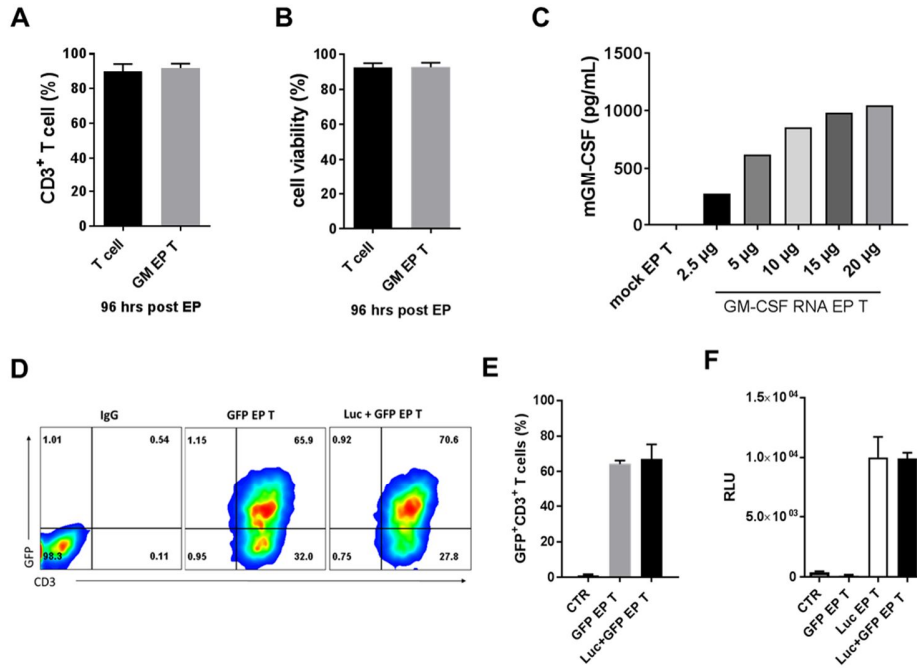

Supplementary figure 4

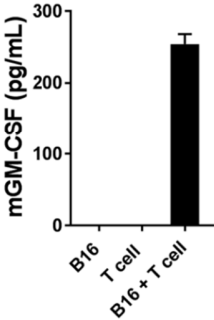

Supplementary figure 5

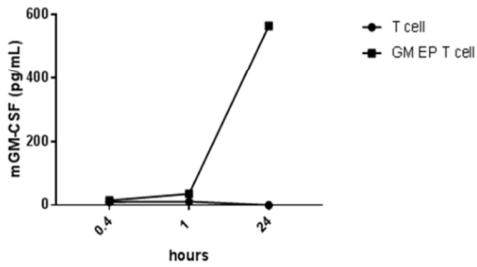

# Supplementary figure 6

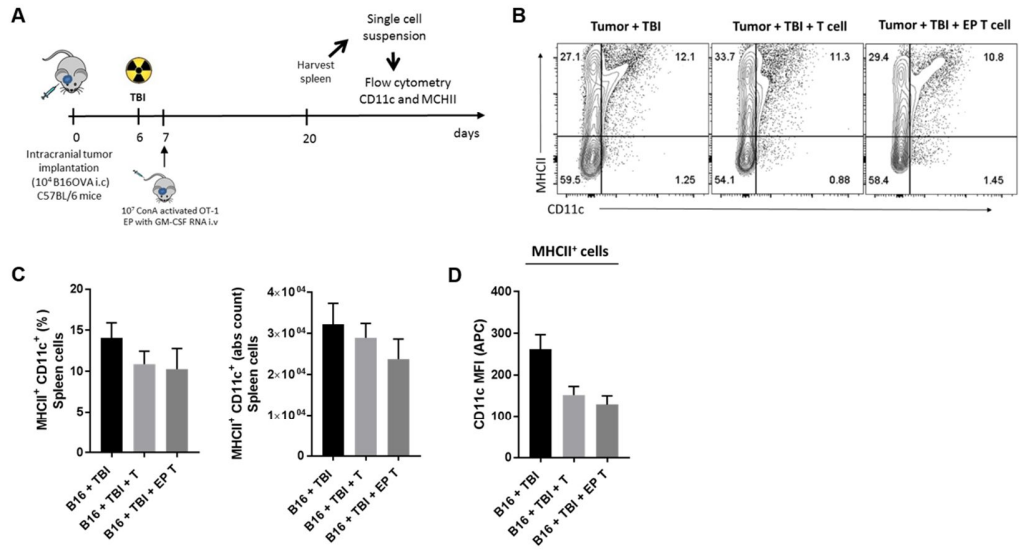

## SUPPLEMENTARY FIGURE LEGENDS

**Supplementary figure 1. Phenotypic analysis of GFP RNA-modified T cell.** Spleen was harvested from naïve or ttRNADC vaccinated C57BL/6 mice. Single cell suspension was expanded with ttRNADC or ConA for 5 and 8 days, respectively. Activated T cells were electroporated with 10 µg of GFP RNA. Cells were harvested at indicated time points for phenotypic analysis of GFP<sup>+</sup> cells by flow cytometry. **(A)** Percentage of CD8<sup>+</sup> and CD4<sup>+</sup> T cell subtypes under GFP<sup>+</sup>CD3<sup>+</sup> gate. **(B)** Representative t-SNE analysis of the percentage of TCM, TEM and TE cells (gated on CD8<sup>+</sup> CD44<sup>+</sup> T cell) negative for GFP, expressing low or high GFP 24 hours after electroporation (gating strategy showed in Figure 2). TCM, central memory T cell; TEM, effector memory T cell; TE, effector T cell; t-SNE, t-distributed stochastic neighbor embedding; ttRNADC, total tumor RNA-pulsed dendritic cells. (\*\*\*\**p* < 0.0001, unpaired *t* test). Values indicated are the mean ± SEM.



### **Supplementary figure 2. Transgene expression decay is correlated with cell proliferation.**

ConA or ttRNADC activated T cells were electroporated with 10  $\mu$ g of GFP RNA at 5-8 days after T cell expansion. At 4 hours post transfection, cells were enriched by GFP expression using FACS. Sorted cells were collected at indicated time points and stained with anti-CD8 and anti-CD44 antibodies for flow cytometry analysis. Decay was considered the transgene expression from each time point, after T cell electroporation, relative to the transgene expression at 24 hours. (A) Scheme of cell sorting strategy. (B) Representative histogram, (C) percentage and (D) MFI of GFP<sup>+</sup> CD8<sup>+</sup> CD44<sup>+</sup> T cell expression over time. (E) Percentage of GFP (F) and MFI decay of GFP<sup>+</sup> CD8<sup>+</sup> CD44<sup>+</sup> T cells. EP, electroporation; FACS, fluorescent-activated cell sorting; MFI, median fluorescence intensity. (\* $p < 0.005$ ; (\*\* $p < 0.01$ ; (\*\*\*) $p < 0.001$ ; \*\*\*\* $p < 0.0001$ , two-way ANOVA). Values indicated are the mean  $\pm$  SEM.

### **Supplementary figure 3. RNA-modified T cell transfection with increasing amount of RNA or multiple RNAs.**

Spleen was harvested from naïve C57BL/6 mice and expanded with 1  $\mu$ g/mL of concanavalin A (ConA). Single cell suspension was electroporated with 10  $\mu$ g of GFP, Gaussia luciferase (Luc, secreted version of the firefly luciferase) or GM-CSF RNA at day 8. Cells were harvested 24 hours after transfection unless otherwise indicated. (A) Percentage and (B) cell viability of CD3<sup>+</sup> T cells detected by flow cytometry 96 hours post electroporation. (C) Murine GM-CSF levels detected in the supernatant by ELISA 24 hours after T cell transfection with increasing concentrations of RNA. (D) Representative contour plot and (E) percentage of GFP<sup>+</sup> CD3<sup>+</sup> activated T cells co-transfected with GFP RNA alone or in combination with Luc RNA. (F) Relative light units detected in the supernatant by luciferase assay 24 hours after electroporation

of ConA activated T cell with GFP RNA alone or in combination with Luc RNA. EP, electroporated; CTR, non-transfected cells. Values indicated are the mean  $\pm$  SEM.

**Supplementary figure 4. Unmodified T cells mediate GM-CSF secretion *in vitro* upon target tumor cell recognition.**

Spleen cells were harvested from OT-1 transgenic mice. Cells were activated with ConA for 8 days and co-cultured with B16F10-OVA (ratio of 10:1). GM-CSF levels were detected by ELISA in the supernatant at 24 hours after co-culture. B16, B16F10-OVA. Values indicated are the mean  $\pm$  SEM.

**Supplementary figure 5. GM-CSF RNA-modified T cells secrete transgene *in vitro*.**

Spleen was harvested from OT-1 transgenic mice. Single cell suspension was expanded with ConA for 8 days. Activated T cells were electroporated with 10  $\mu$ g of murine GM-CSF RNA. Supernatant was harvested and cytokine levels were detected by ELISA at indicated time points post electroporation.

**Supplementary figure 6. DC phenotype remained unchanged following systemic GM-CSF RNA-modified T cell administration.**

Spleen was harvested from OT-1 transgenic mice. Single cell suspension was expanded with ConA for 8 days and EP with 10  $\mu$ g of murine GM-CSF RNA.  $10 \times 10^6$  of GM-CSF-expression OT-1 T cells were injected i.v (shortly after RNA electroporation) into tumor-bearing C57BL/6 mice at 7 days post i.c B16F10-OVA implantation ( $1 \times 10^4$  cells/mouse). Mice received TBI (5 Gy) 24 hours prior to ACT. Mice were sacrificed and spleen was harvested 13 days post T cell injection. DCs were detected by flow cytometry using anti-CD11c and anti-MHCII antibodies. (A) Schematic figure illustrating the experimental design. (B) Representative contour plot, (C) percentage and absolute count. (D) MFI of CD11c<sup>+</sup> cells under the MHCII<sup>+</sup> gate detected in the

spleen. ACT, adoptive cell transfer; EP, electroporated; Gy, gray; TBI, total body irradiation; T, T cell; B16, B16F10-OVA; MFI, median fluorescence intensity. Values indicated are the mean  $\pm$  SEM.
